# Supplementary material for: Moldable Mask: A Reusable, Hot Water Moldable, Additively Manufactured Mask to Be Used as an N95 Alternative
Source: MDPI journal article supplement (doi:10.3390/ma14227082), 2021-11-22
Supplement: s1 [file s1]

Article

# Moldable Mask: A Reusable, Hot Water Moldable, Additively Manufactured Mask to Be Used as an N95 Alternative

Erica Martelly \*, Charles Li and Kenji Shimada

Department of Mechanical Engineering, Carnegie Mellon University, Pittsburgh, PA 15213, USA; cli3@andrew.cmu.edu (C.L.); shimada@cmu.edu (K.S.)

\* Correspondence: emartell@andrew.cmu.edu

**Citation:** Martelly, E.; Li, C.; Shimada, K. Moldable Mask: A Reusable, Hot Water Moldable, Additively Manufactured Mask to Be Used as an N95 Alternative. *Materials* **2021**, *14*, x. <https://doi.org/10.3390/xxxxx>

Academic Editor: Christopher C. Berndt

Received: 30 September 2021

Accepted: 19 November 2021

Published: date

**Publisher's Note:** MDPI stays neutral with regard to jurisdictional claims in published maps and institutional affiliations.

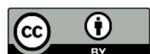

**Copyright:** © 2021 by the authors. Submitted for possible open access publication under the terms and conditions of the Creative Commons Attribution (CC BY) license (<http://creativecommons.org/licenses/by/4.0/>).

**Table S1.** Complete fit testing results for all subjects.

| Subject #  | Sex | Age | Mask Type     | Molded Mask  |         |              |             |         |       | Unmolded Mask |         |              |             |         |       |
|------------|-----|-----|---------------|--------------|---------|--------------|-------------|---------|-------|---------------|---------|--------------|-------------|---------|-------|
|            |     |     |               | Bending Over | Talking | Side to Side | Up and Down | Overall | Pass? | Bending Over  | Talking | Side to Side | Up and Down | Overall | Pass? |
| 1          | F   | 30  | medium        | 171          | 200     | 161          | 195         | 180     | Y     | 8             | 5       | 4            | 4           | 5       | N     |
| 2          | F   | 24  | medium        | 200          | 160     | 200          | 200         | 189     | Y     | 2             | 3       | 2            | 2           | 2       | N     |
| 3          | M   | 21  | medium        | 123          | 60      | 74           | 46          | 67      | N     | 2             | 3       | 3            | 2           | 3       | N     |
| 4          | F   | 20  | medium        | 145          | 93      | 65           | 171         | 103     | Y     | 6             | 7       | 7            | 6           | 6       | N     |
| 5          | F   | 21  | flatter nose  | 200          | 200     | 200          | 200         | 200     | Y     | 1             | 1       | 1            | 1           | 1       | N     |
| 6          | M   | 19  | medium        | 129          | 108     | 141          | 200         | 137     | Y     | 5             | 3       | 3            | 3           | 3       | N     |
| 7          | F   | 24  | medium        | 200          | 187     | 200          | 200         | 197     | Y     | 1             | 1       | 2            | 3           | 1       | N     |
| 8          | M   | 24  | medium-narrow | 86           | 71      | 54           | 79          | 70      | N     | 1             | 1       | 1            | 1           | 1       | N     |
| 9          | M   | 24  | medium-wide   | 104          | 24      | 12           | 18          | 21      | N     | 1             | 1       | 1            | 1           | 1       | N     |
| 10         | M   | 24  | medium        | 200          | 174     | 200          | 200         | 193     | Y     | 1             | 2       | 1            | 1           | 1       | N     |
| 11         | F   | 21  | medium        | 200          | 200     | 200          | 200         | 200     | Y     | 1             | 1       | 1            | 1           | 1       | N     |
| 12         | F   | 18  | medium        | 200          | 118     | 129          | 71          | 114     | Y     | 146           | 110     | 57           | 35          | 64      | N     |
| 13         | M   | 20  | medium        | 200          | 148     | 200          | 200         | 184     | Y     | 4             | 3       | 1            | 2           | 2       | N     |
| Total Pass |     |     |               |              |         |              |             |         | 10    | Total Pass    |         |              |             |         | 0     |
